# Supplementary material for: Large-scale and solvent-free synthesis of magnetic bamboo-like nitrogen-doped carbon nanotubes with nickel active sites for photothermally driven CO2fixation
Source: Royal Society of Chemistry journal article supplement (doi:10.1039/d2gc04701b), 2023-01-01
Supplement: d2gc04701b1.pdf [file d2gc04701b1.pdf]

## Electronic Supplementary Information

### Large-Scale and Solvent-Free Synthesis of Magnetic Bamboo-Like Nitrogen-Doped Carbon Nanotubes with Nickel Active Sites for Photothermal-Driven CO<sub>2</sub> Fixation

*Yingchun Guo,<sup>a</sup> Xinxin Wang,<sup>b</sup> Lei Feng,<sup>b</sup> Feng Liu,<sup>c</sup> Jinsheng Liang,<sup>\*a</sup> Xiaomei*

*Wang<sup>\*b</sup> and Xu Zhang<sup>\*b</sup>*

<sup>a</sup> Key Laboratory of Special Functional Materials for Ecological Environment and Information, School of Materials Science and Engineering, Hebei University of Technology, Ministry of Education, Tianjin 300130, China

<sup>b</sup> Hebei Key Laboratory of Functional Polymers, School of Chemical Engineering and Technology, Hebei University of Technology, Tianjin 300130, China

<sup>c</sup> Institute of Materials Science and Devices, School of Materials Science and Engineering, Suzhou University of Science and Technology, Suzhou 215011, China

\*Corresponding Author: E-mail: [xmwang@hebut.edu.cn](mailto:xmwang@hebut.edu.cn); [xuzhang@hebut.edu.cn](mailto:xuzhang@hebut.edu.cn); [liangjinsheng@hebut.edu.cn](mailto:liangjinsheng@hebut.edu.cn)

**Chemicals.** All chemicals were purchased from commercial supplies and used without further purification. Nickel acetate ( $\text{Ni}(\text{CH}_3\text{COO})_2 \cdot 4\text{H}_2\text{O}$ , 98%), zinc hydroxide ( $\text{Zn}(\text{OH})_2$ , 98%), nickel nitrate hexahydrate ( $\text{Ni}(\text{NO}_3)_2 \cdot 6\text{H}_2\text{O}$ , 98%), zinc nitrate hexahydrate ( $\text{Zn}(\text{NO}_3)_2 \cdot 6\text{H}_2\text{O}$ , 98%) 2-methylimidazole (2-MeIM, 99%), and methanol ( $\text{CH}_3\text{OH}$ , 99%) were received from Tianjin Fuchen Chemical Corporation. Amines (>98%), phenylsilane ( $\text{PhSiH}_3$ , 98%), and *N, N*-Dimethylformamide (DMF, 98%) were received from Aladdin. Carbon dioxide and Ar gas were obtained from Tianjin Dongrun Gas Co., Ltd.

**Characterizations.** The morphology and structure were acquired by field-emission scanning electron microscopy with different accelerating voltages (SEM, FEI Nova NanoSEM450) and transmission electron microscopy (TEM, FEI Talos F200S, 200 kV). The aberration-corrected high-angle annular dark-field scanning transmission electron microscopy (AC-HAADF-STEM) measurements were taken on a Titan Themis Cubed G2 60-300, FEI. X-ray diffraction (XRD) patterns were investigated by a Bruker D8-Davinci equipped with  $\text{Cu K}\alpha$  radiation source. X-ray photoelectron spectroscopy (XPS) measurements were conducted on a Thermo Scientific ESCALab-250Xi spectrometer with monochromatic  $\text{Al K}\alpha$  radiation, and the binding energies were calibrated using the C 1s peak at 284.6 eV. Nitrogen adsorption-desorption isotherms were acquired on a surface area and porosity analyzer (Micromeritics ASAP 2020). The content of Ni atoms was investigated by an Optima 7300 DV inductively coupled plasma optical emission spectroscopy (ICP-OES). Fourier transform infrared (FT-IR) spectra were performed on a Bruker VECTOR-22 spectrometer. The  $^1\text{H}$ -

nuclear magnetic resonance (NMR) spectra were analyzed and identified by a Bruker 400 spectrometer using  $\text{CDCl}_3$  as a solvent and tetramethylsilane (TMS) as an internal standard. Electron paramagnetic resonance (EPR) spectra were collected by a Bruker EMXnano. Raman spectra were recorded on a Renishaw inVia Reflex UV Raman spectrometer with an excitation laser wavelength of  $\lambda = 532$  nm. The obtained liquid solution after the reaction was identified by GC-MS. Magnetic hysteresis loops of the materials were measured at room temperature via a vibrating sample magnetometer (VSM, MPMS XL-7).

**Computational details.** All the calculations are performed in the framework of the density functional theory with the projector augmented plane-wave method, as implemented in the Vienna ab initio simulation package. The generalized gradient approximation proposed by Perdew, Burke, and Ernzerhof is selected for the exchange-correlation potential. The long range van der Waals interaction is described by the DFT-D3 approach. The cut-off energy for plane wave is set to 550 eV. The energy criterion is set to  $10^{-6}$  eV in iterative solution of the Kohn-Sham equation. A vacuum layer of 20 Å is added perpendicular to the sheet to avoid artificial interaction between periodic images. The Brillouin zone integration is performed using a  $2 \times 2 \times 1$  k-mesh. All the structures are relaxed until the residual forces on the atoms have declined to less than  $0.01$  eV/Å.

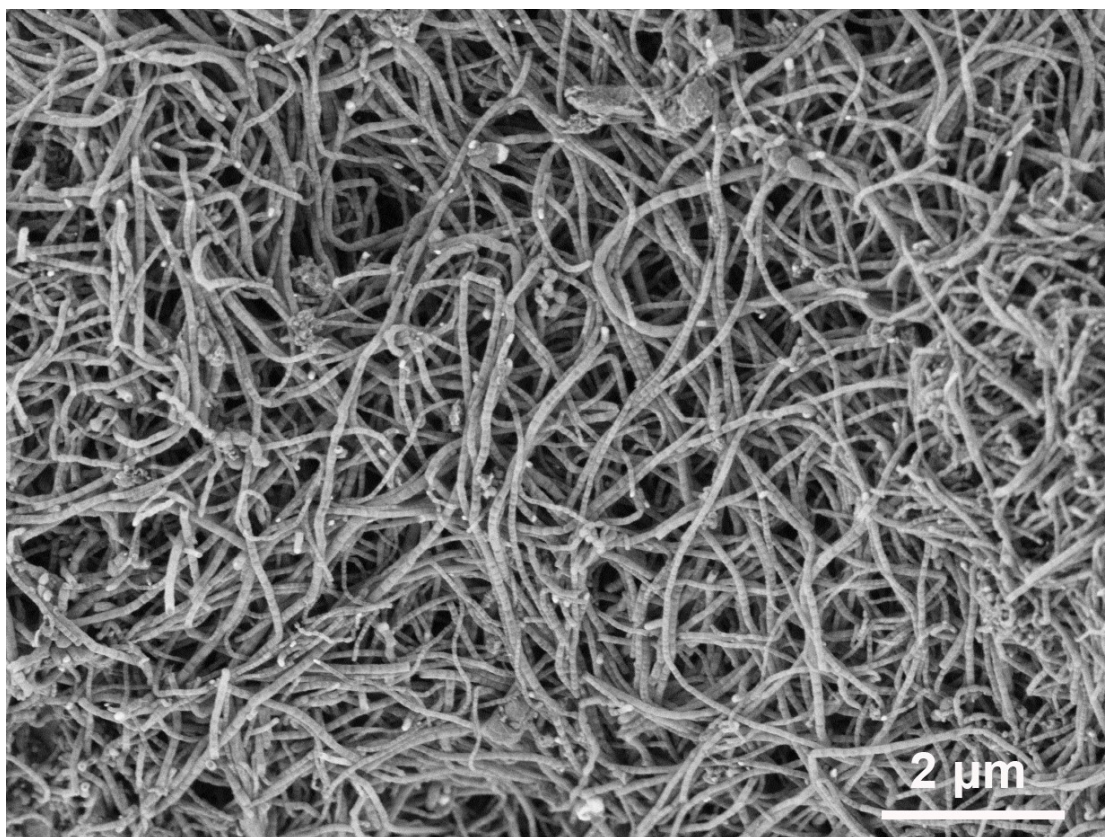

**Figure S1.** SEM image of Ni-SAs/NPs@BNCNTs (concentric backscattered retractable detector at 1 kV).

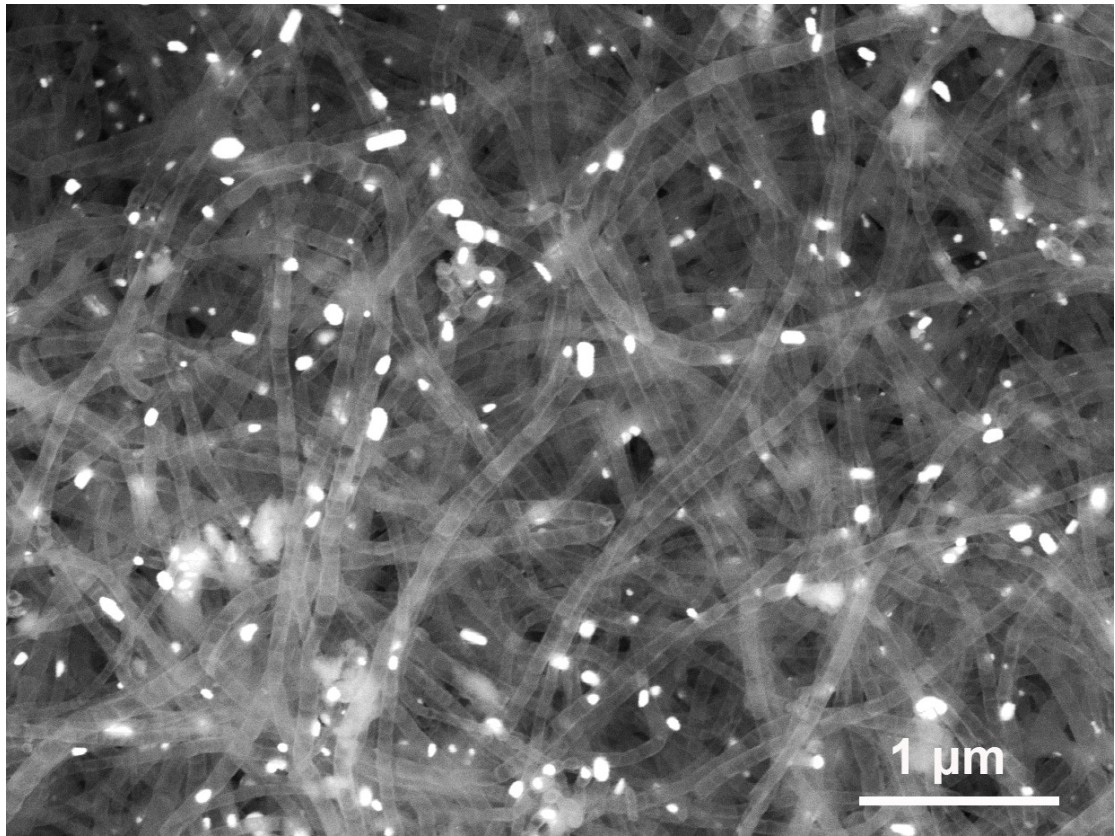

**Figure S2.** SEM image of Ni-SAs/NPs@BNCNTs (concentric backscattered retractable detector at 5 kV).

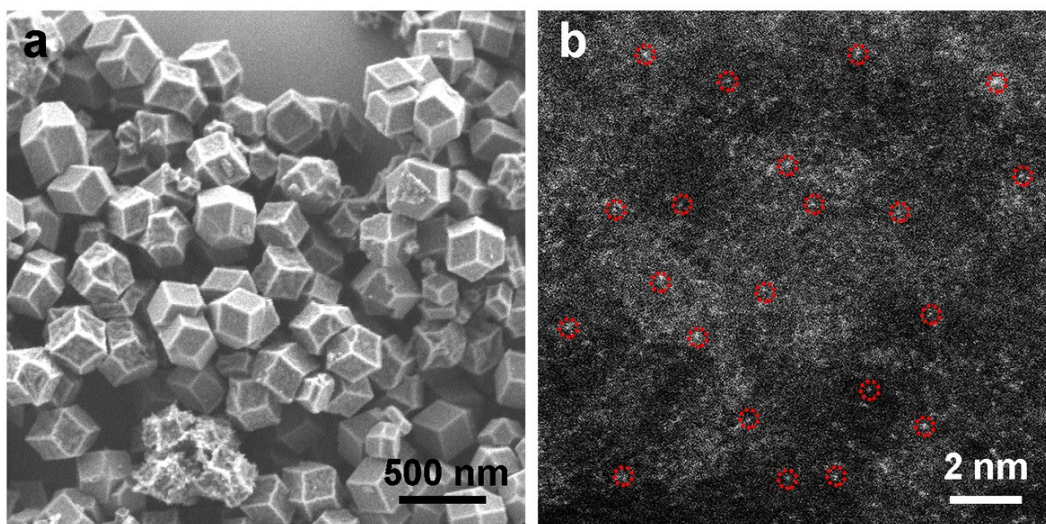

**Figure S3.** (a) SEM image and (b) aberration-corrected HAADF-STEM image of the Ni-SAs@NC.



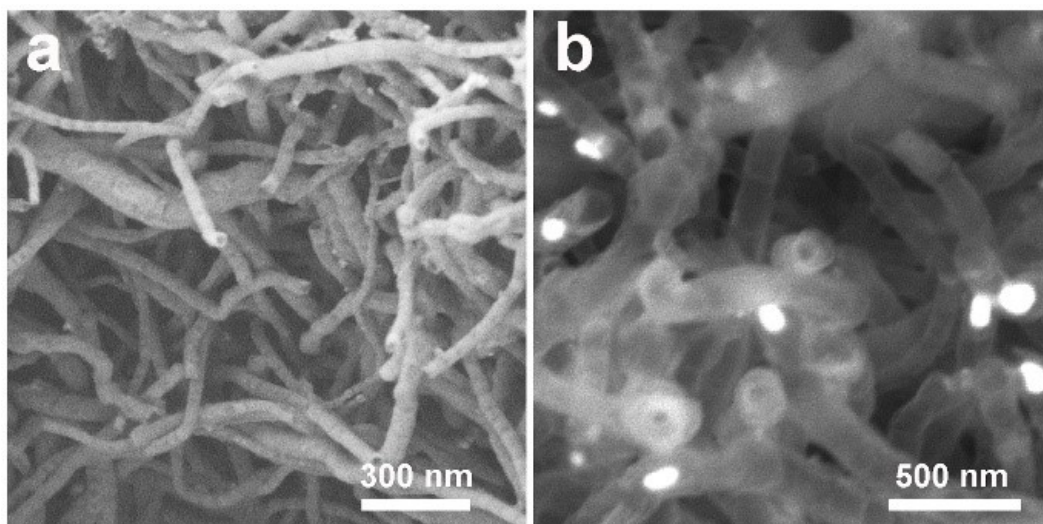

**Figure S4.** SEM images of the Ni-NPs@BNCNTs (a) concentric backscattered retractable detector at 1 kV and (b) at 5 kV.

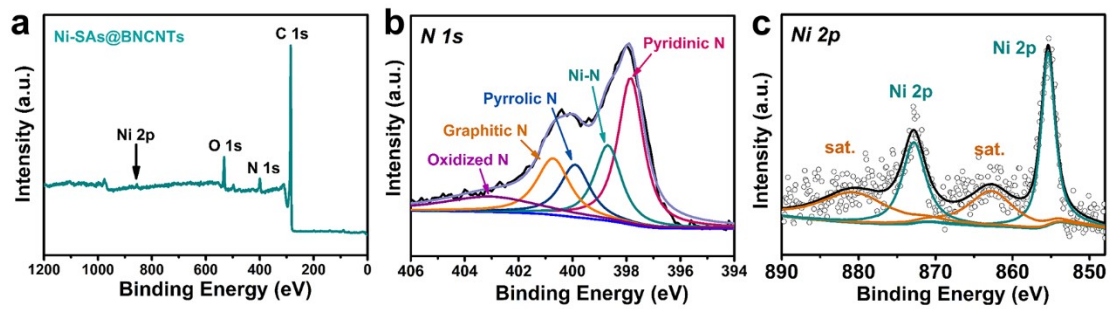

**Figure S5.** (a) Wide-survey XPS spectrum, (b) high-resolution N 1s XPS spectrum, and (c) high-resolution Ni 2p XPS spectrum of Ni-SAs@BNCNTs.



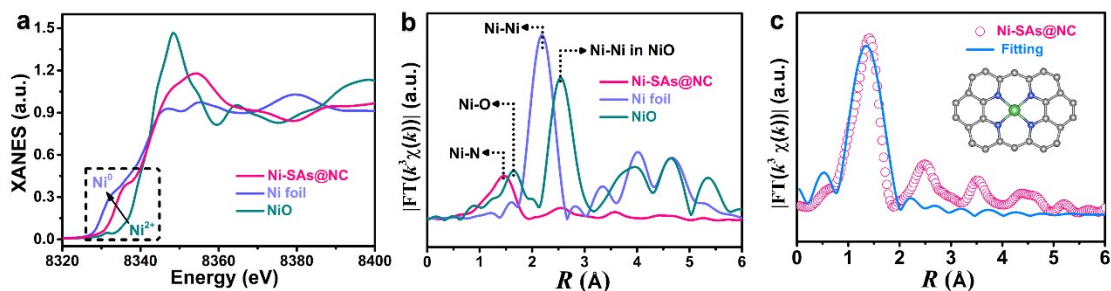

**Figure S6.** (a) Ni K-edge XANES and (b) Fourier transform (FT) Ni K-edge EXAFS spectra of Ni foil, NiO, and Ni-SAs@NC. (c) FT-EXAFS R-space fitting curve of Ni-SAs@NC. Inset: the model of Ni-SAs@NC.

To uncover the valence state and coordination environment of single-Ni atoms in Ni-SAs@NC, a synchrotron-based X-ray absorption test was performed. The X-ray absorption near-edge structure (XANES) spectra disclose that the energy absorption threshold values of Ni in Ni-SAs@NC lies between those of Ni foil and NiO, indicating the oxidation state of the single-Ni species between 0 and +2 (Figure 6a). Fourier transform-extended X-ray absorption fine structures (FT-EXAFS) of Ni-SAs@NC display Ni-N peaks at 1.4 Å without Ni-O (1.6 Å) or Ni-Ni bonds (2.2 Å), illustrating the single-atomic Ni dispersion (Figure 6b). Additionally, the EXAFS fittings result confirms that Ni-N<sub>4</sub> configuration is the dominant coordination mode of Ni atoms in Ni-SA@BNCNTs (Figure 6c).

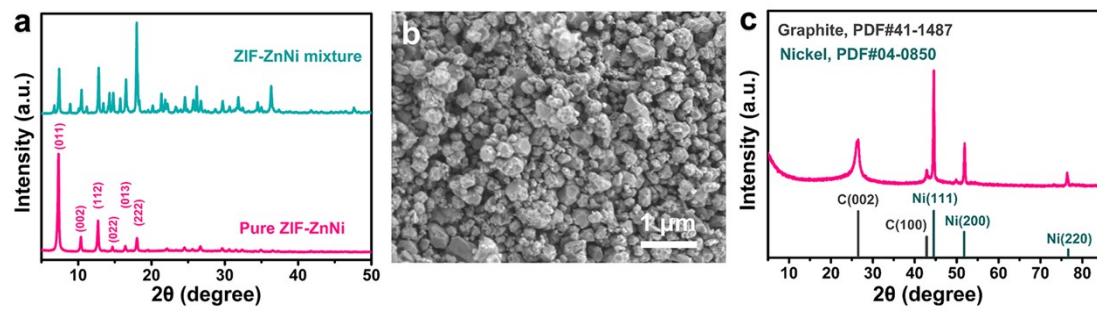

**Figure S7.** (a) XRD patterns of ZIF-ZnNi mixture and pure ZIF-ZnNi. (b) SEM image of the pure ZIF-ZnNi. (c) XRD pattern of Ni-SAs/NPs@BNCNTs.

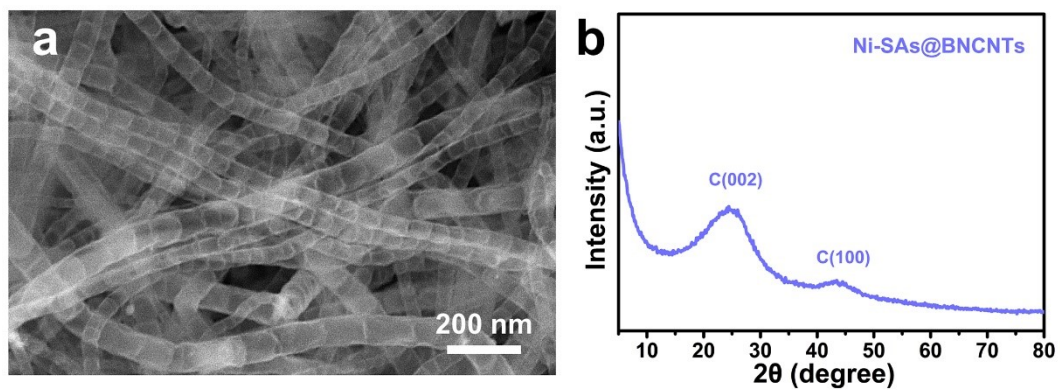

**Figure S8.** (a) SEM images of Ni-SAs@BNCNTs. (b) XRD pattern of the Ni-SAs@BNCNTs.

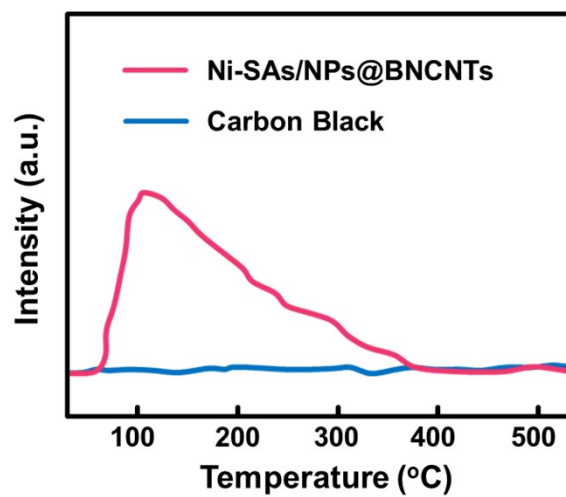

**Figure S9.** CO<sub>2</sub>-TPD profiles of Ni-SAs/NPs@BNCNTs and carbon black.

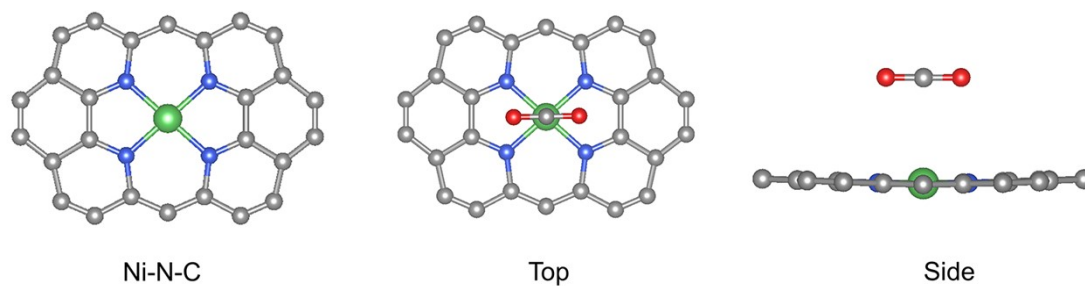

**Figure S10.** CO<sub>2</sub> adsorption model on Ni-N-C.

**Table S1.** The effect of photogenerated electrons on the adsorption energy of CO<sub>2</sub>.

| Adsorption Energy              |          |                           |
|--------------------------------|----------|---------------------------|
| Data                           | Ni-N-C   | Ni-N-C and e <sup>-</sup> |
| E <sub>b</sub>                 | 0.224 eV | -0.072 eV                 |
| Ni-C <sub>CO2</sub> (distance) | 3.319 Å  | 3.285 Å                   |

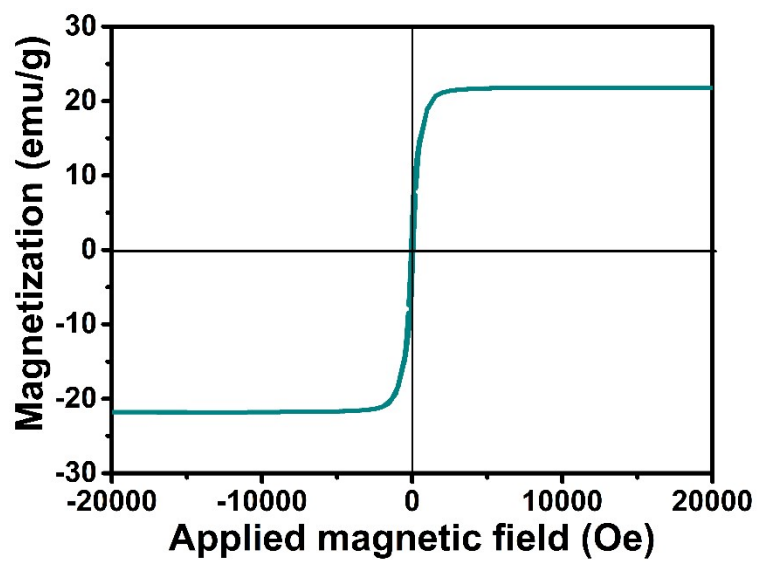

**Figure S11.** The magnetic hysteresis loop of Ni-NPs/SAs@BNCNTs.



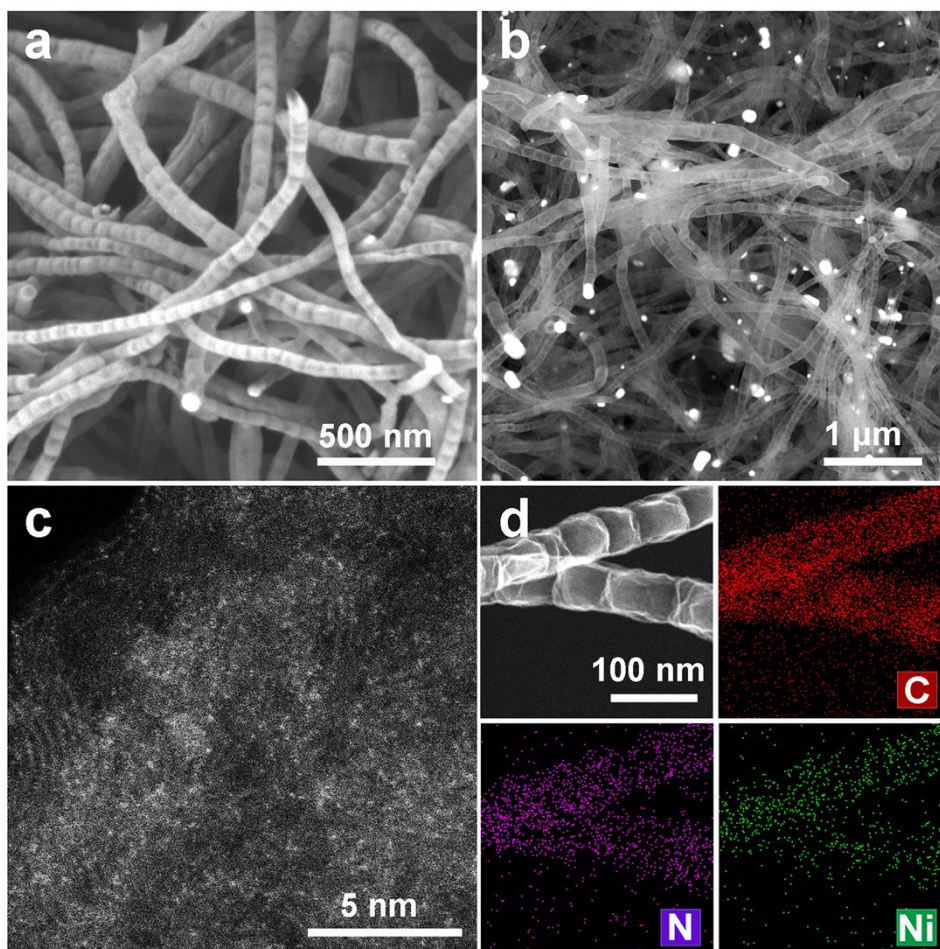

**Figure S12.** (a) SEM image (at 1 kV), (b) SEM image (at 5 kV), (c) Aberration-corrected HAADF-STEM image, and (d) HAADF-STEM image and corresponding element mappings of Ni-SAs/NPs@BNCNTs after using for 10 times.

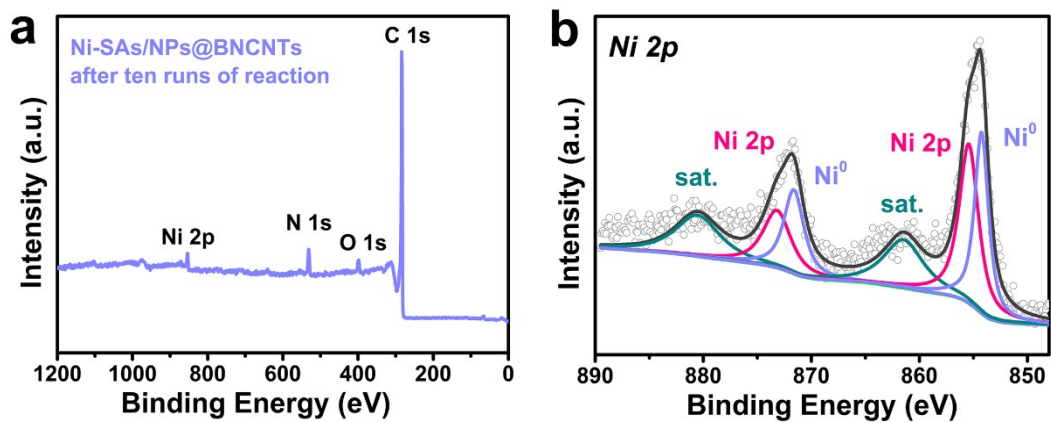

**Figure S13.** XPS spectra of Ni-SAs/NPs@BNCNTs after using for 10 times (a) survey scan and (b) Ni 2p.

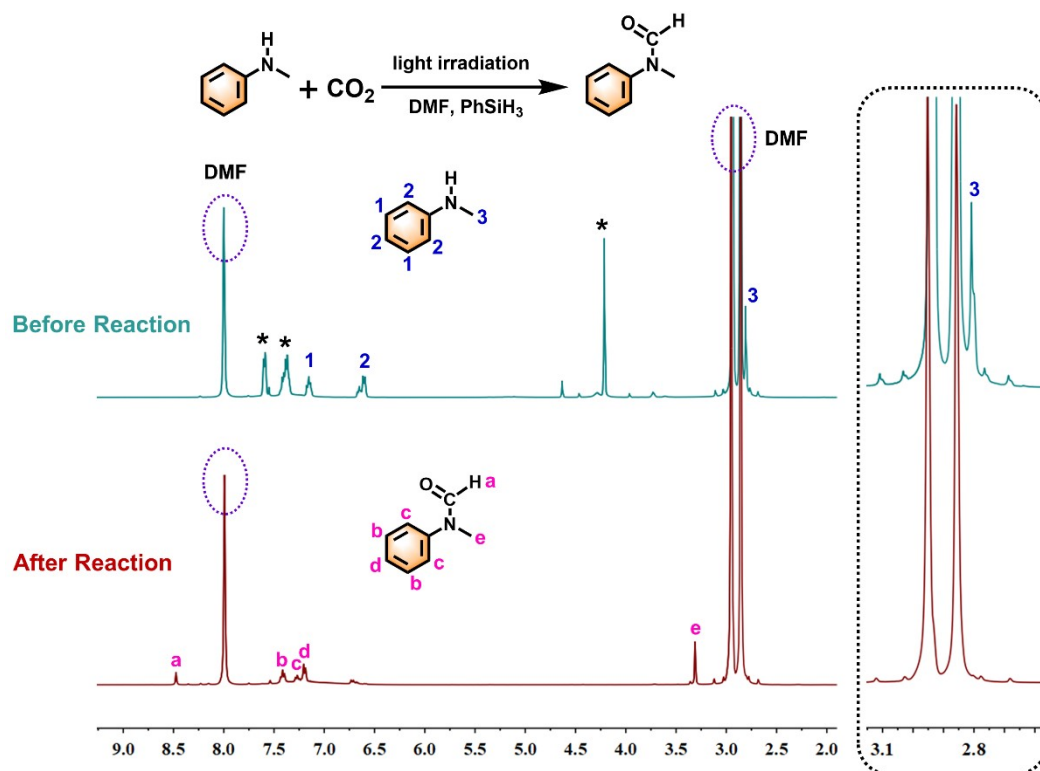

**Figure S14.** Crude  $^1\text{H-NMR}$  spectra of  $N$ -formylation of  $N$ -methylaniline with  $\text{CO}_2$  and  $\text{PhSiH}_3$  by using  $\text{Ni-SAs/NPs@BNCNTs}$ . Signals with asterisk are related to  $\text{PhSiH}_3$ .

**Product ( $N$ -methylformanilide).**  $^1\text{H-NMR}$  ( $\text{CDCl}_3$ , 400 MHz)  $\delta$  8.48 (s, 1H),  $\delta$  7.42 (t,  $J = 7.8$  Hz, 2H), 7.28 (t,  $J = 7.4$  Hz, 1H), 7.18 (d,  $J = 7.6$  Hz, 2H),  $\delta$  3.33 (s, 3H).

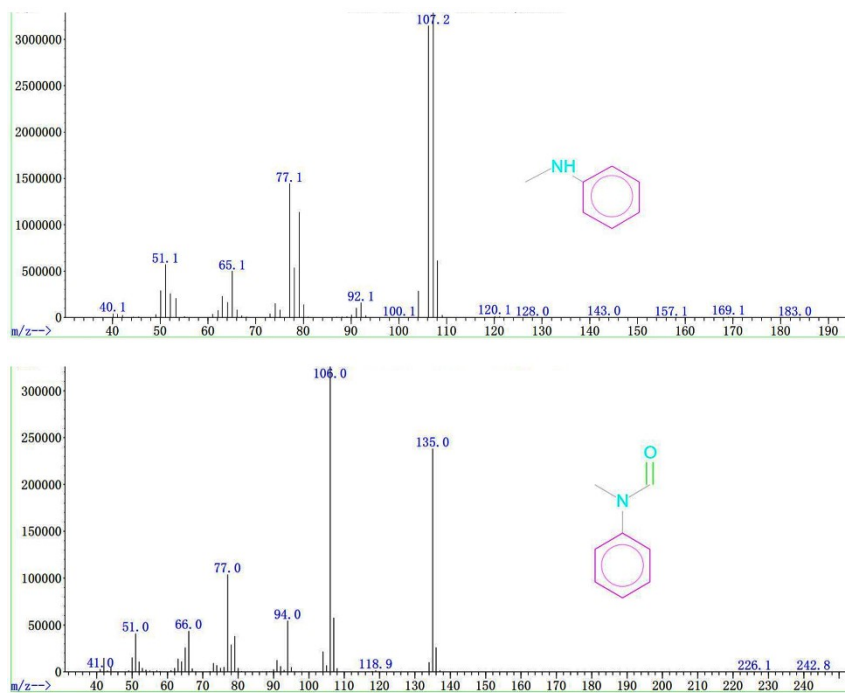

**Figure S15.** The mass spectra of *N*-methylaniline and *N*-methylformanilide.

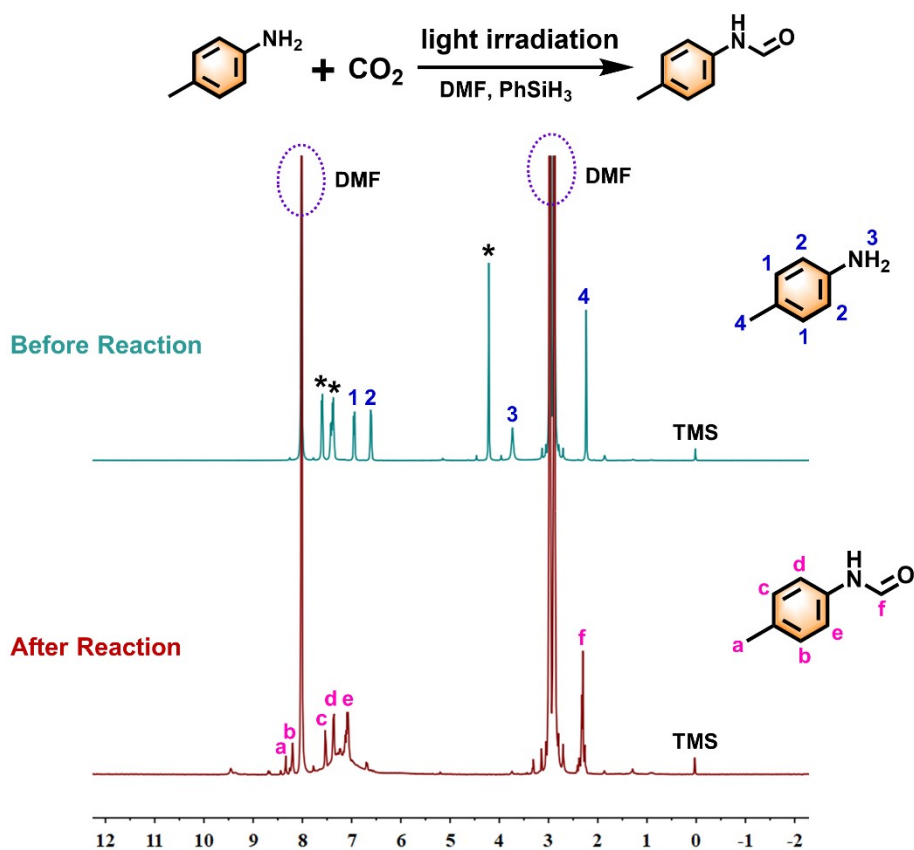

**Figure S16.** Crude  $^1\text{H-NMR}$  spectra of *N*-formylation of *p*-toluidine with  $\text{CO}_2$  and  $\text{PhSiH}_3$  by using Ni-SAs/NPs@BNCNTs. Signals with asterisk are related to  $\text{PhSiH}_3$ .

**Product (*N-p*-tolylformamide).**  $^1\text{H-NMR}$  ( $\text{CDCl}_3$ , 400 MHz)  $\square$  8.42, 8.15 (d,  $J = 11.35$  Hz, and br, total 1H), 7.42 (d,  $J = 8.72$ , 1H), 7.15 (t,  $J = 8.54$ , 2H), 6.97 (d,  $J = 8.01$ , 1H), 2.32 (d,  $J = 6.47$ , 3H).

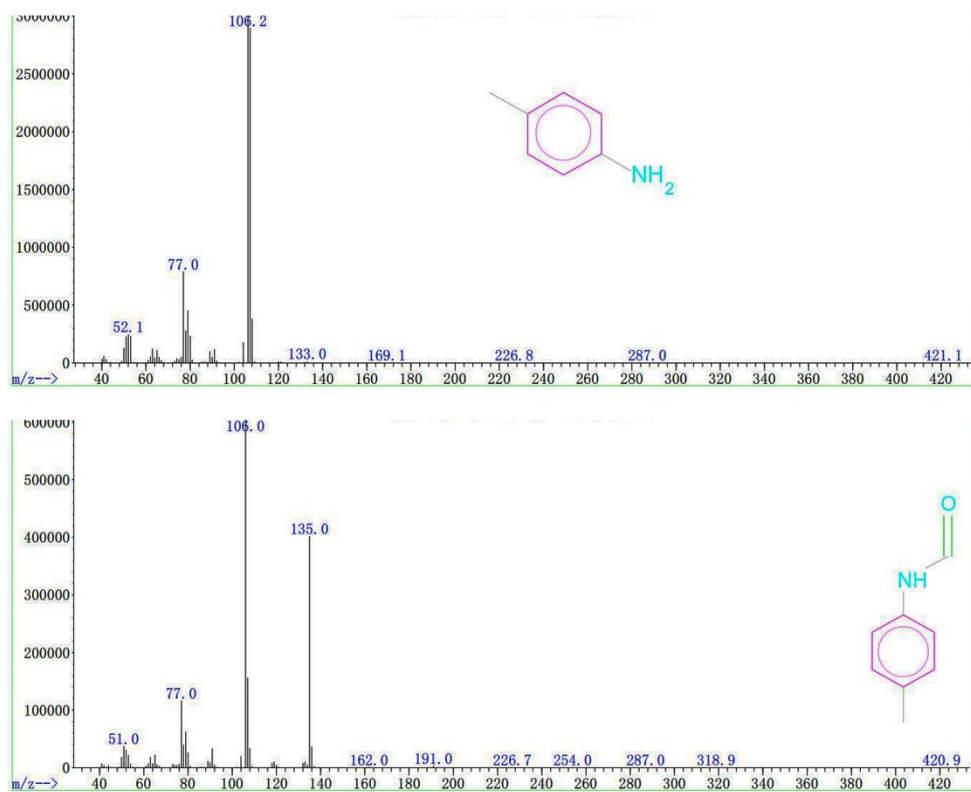

**Figure S17.** The mass spectra of *p*-toluidine and *N*-*p*-tolylformamide.



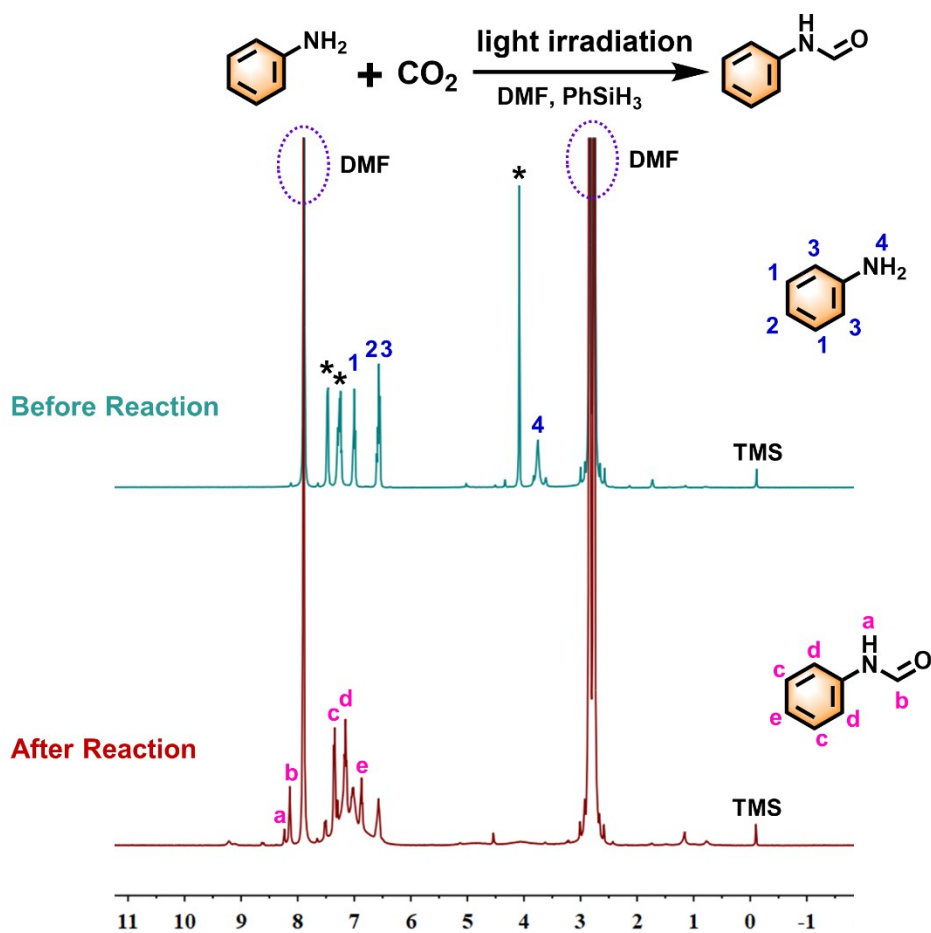

**Figure S18.** Crude <sup>1</sup>H-NMR spectra of *N*-formylation of aniline with CO<sub>2</sub> and PhSiH<sub>3</sub> by using Ni-SAs/NPs@BNCNTs. Signals with asterisk are related to PhSiH<sub>3</sub>.

**Product (*N*-phenylformamide).** <sup>1</sup>H-NMR (CDCl<sub>3</sub>, 400 MHz) □ δ = 8.68 (s, 1H), 8.36 (s, 1H), 7.60-7.48 (m, 1H), 7.43-7.28 (m, 2H), 7.24-7.05 (m, 2H).

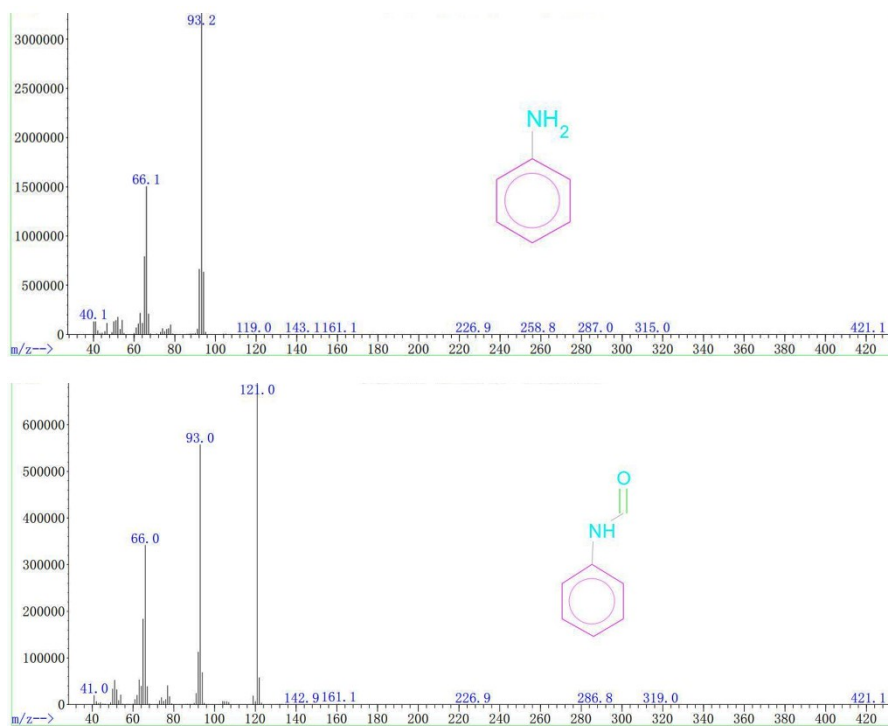

**Figure S19.** The mass spectra of aniline and *N*-phenylformamide.

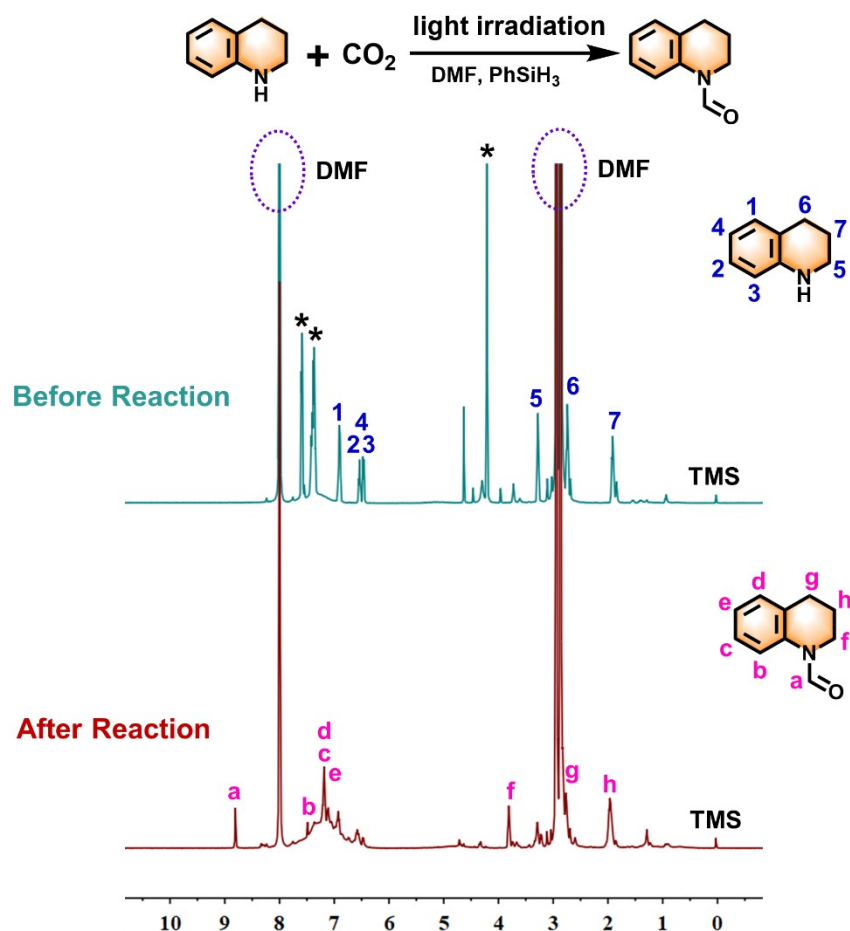

**Figure S20.** Crude  $^1\text{H}$ -NMR spectra of *N*-formylation of aniline with  $\text{CO}_2$  and  $\text{PhSiH}_3$  by using Ni-SAs/NPs@BNCNTs. Signals with asterisk are related to  $\text{PhSiH}_3$ .

**Product (3,4-dihydroquinoline-1(2*H*)-carbaldehyde).**  $^1\text{H}$ -NMR ( $\text{CDCl}_3$ , 400 MHz) □ major isomer  $\delta$  8.76 (s, 1H), 7.24 – 7.04 (m, 4H), 3.81 – 3.78 (m, 2H), 2.80 (t,  $J = 6.4$  Hz, 2H), 1.97 – 1.91 (m, 2H); minor isomer  $\delta$  8.30 (s, 0.09H), 7.42 – 7.30 (m, 0.36H), 3.64 – 3.62 (m, 0.18H), 2.89 (t,  $J = 6.7$  Hz, 0.18H), 2.05 – 1.99 (m, 0.18H).

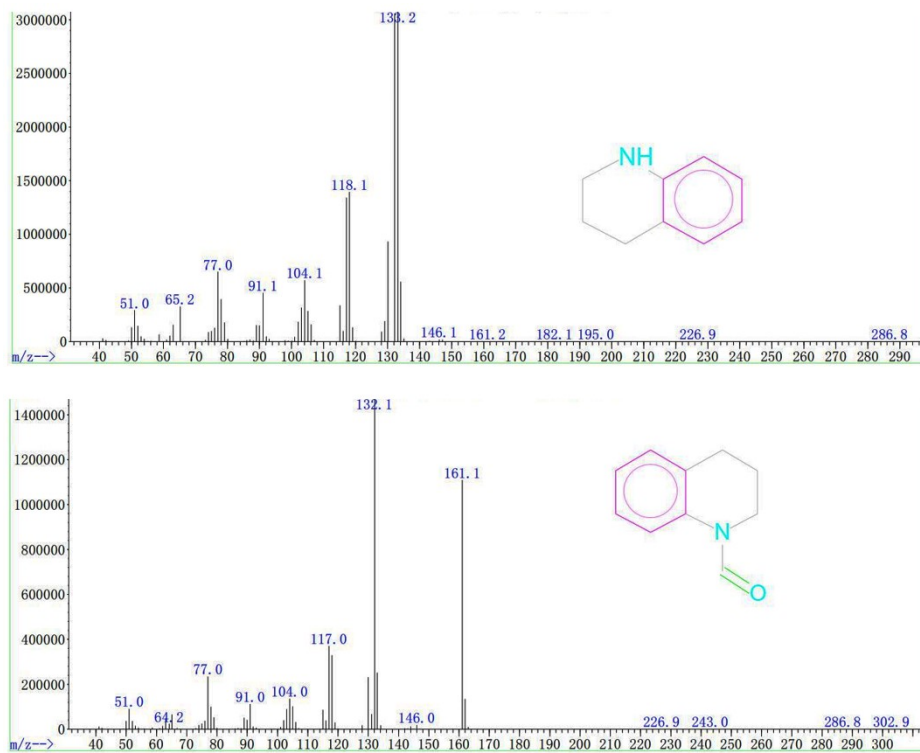

**Figure S21.** 1,2,3,4-tetrahydroquinoline and 3,4-dihydroquinoline-1(2H)-carbaldehyde.

**Table S2.** Summary of high performance metal-based catalysts for *N*-formylation.

| Catalyst                                                         | Metal     | Hydrosilane                | Reaction Conditions         |                        |           | Yield (%) | Reference                                       |
|------------------------------------------------------------------|-----------|----------------------------|-----------------------------|------------------------|-----------|-----------|-------------------------------------------------|
|                                                                  |           |                            | T (°C)                      | P <sub>CO2</sub> (MPa) | Time (h)  |           |                                                 |
| PdNPore                                                          | Pd        | PhSiH <sub>3</sub>         | 60                          | 1                      | 20        | 90        | <i>Asian J. Org. Chem.</i> 2022, e202200064     |
| Zn powder                                                        | Zn        | (EtO) <sub>3</sub> SiH     | 120                         | 1.5                    | 24        | 80        | <i>Chin. J. Chem.</i> 2020, 38, 1057-1064       |
| Br-PMOF(Ir)                                                      | Ir        | PhSiH <sub>3</sub>         | 25                          | 0.1                    | 43        | 83        | <i>Chem. Eur. J.</i> 2022, e202200555           |
| Pd@HMP-1                                                         | Pd        | diphenylmethylsilane       | 60                          | 1                      | 20        | 93        | <i>ChemCatChem</i> 2017, 9, 1939-1946           |
| Pd-PS-amtp                                                       | Pd        | poly(methyl-hydrosiloxane) | 50                          | 1                      | 10        | 96        | <i>ChemistrySelect</i> 2019, 4, 3961-3972       |
| ZnO+TBAB                                                         | Zn        | PhSiH <sub>3</sub>         | 40                          | 1                      | 2         | 98        | <i>Catal. Commun.</i> 2021, 149, 106195         |
| Pt <sub>1</sub> /Ti <sub>3-x</sub> C <sub>2</sub> T <sub>y</sub> | Pt        | Et <sub>3</sub> SiH        | 140                         | 1                      | 10        | 97        | <i>J. Am. Chem. Soc.</i> 2019, 141, 4086-4093   |
| Zn-TpPa                                                          | Zn        | PhSiH <sub>3</sub>         | 30                          | 0.1                    | 12        | 97.5      | <i>Appl. Catal B-Environ.</i> 2021, 294, 120238 |
| Zn(OAc) <sub>2</sub> @P(BiPy-DVB)-1                              | Zn        | PhSiH <sub>3</sub>         | 30                          | 0.1                    | 5         | 94        | <i>J. CO<sub>2</sub> Util.</i> 2022, 65, 102214 |
| ZnPc/g-C <sub>3</sub> N <sub>4</sub>                             | Zn        | PhSiH <sub>3</sub>         | 20 W LED                    | 0.1                    | 24        | 95        | <i>Catal. Sci. Technol.</i> 2022, 12, 2688-2702 |
| Cu/BiVO <sub>4</sub>                                             | Cu        | PhSiH <sub>3</sub>         | 20 W LED                    | 0.1                    | 24        | 64        | <i>J. CO<sub>2</sub> Util.</i> 2021, 45, 101402 |
| <b>Ni-SAs/NPs@BNCNTs</b>                                         | <b>Ni</b> | <b>PhSiH<sub>3</sub></b>   | <b>0.2 W/cm<sup>2</sup></b> | <b>0.1</b>             | <b>12</b> | <b>95</b> | <b>This work</b>                                |
